# Supplementary material
Source: PubMed Central journal article supplement (PMC6689151)
Supplement: NIHMS1032418-supplement-Supp_info.pdf [file NIHMS1032418-supplement-Supp_info.pdf]

**Supplemental Figure 1.**

**A. Liver**

**VWF KO**

**VWF/SCARA5 DKO**

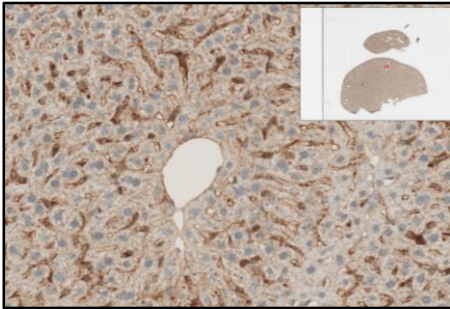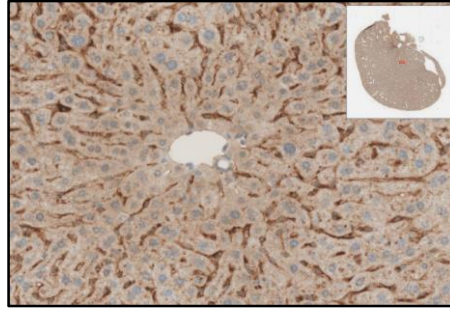

**B. Kidney**

**VWF KO**

**VWF/SCARA5 DKO**

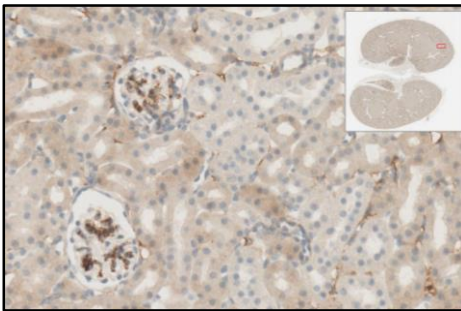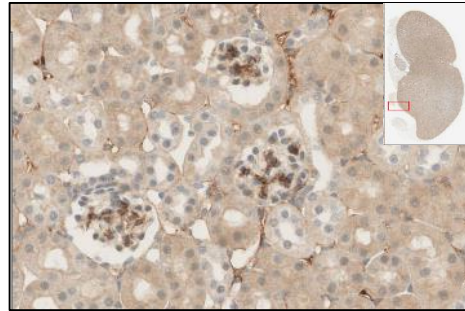

**C. Spleen**

**VWF KO**

**VWF/SCARA5 DKO**

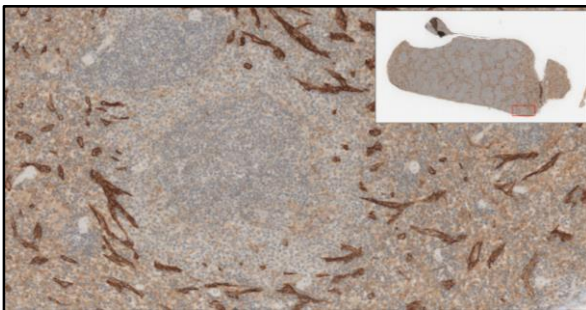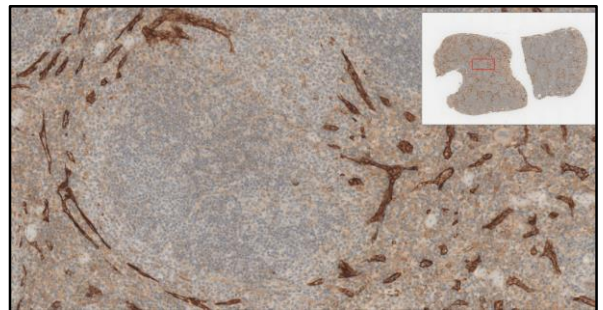

## Supplemental Figure 2.

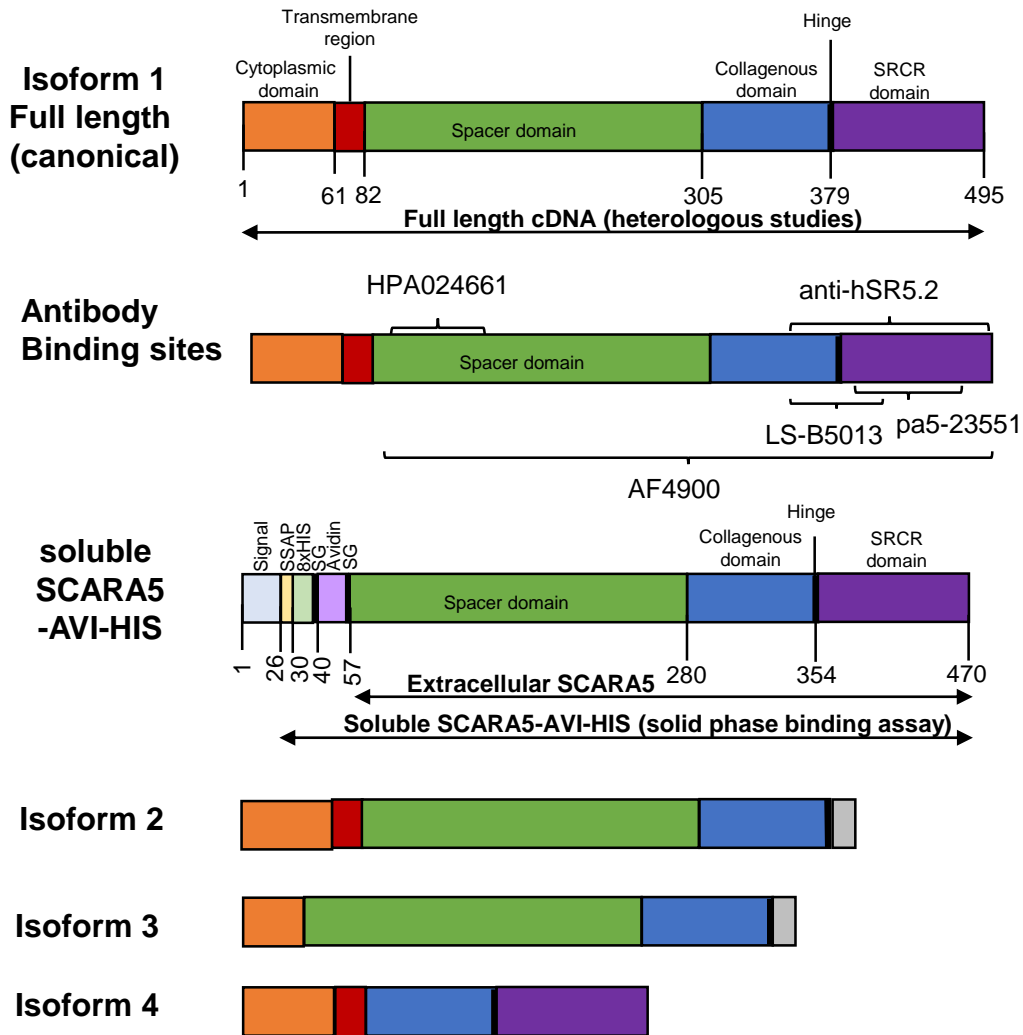

### Supplemental Figure 3.

#### >soluble SCARA5-AVI-HIS cDNA sequence – 1430 bp

gtcaGCTAGCCCACCatggggcgccgggcccgcaccctgcggtggcgctcggcctcctgctgctggcgacgctgcttgcgccg  
ccgacgccccaagcgctcctCATCACCATCACCATCACCATCACAGCGGTGGCCTGAACGACATCTTC  
GAGGCTCAGAAAATCGAATGGCACGAAAGCGGTAGGCCGCGCAGCTCCCCTGACGACCTGA  
AGGCCCTGACTCGCAATGTGAACCGGCTGAATGAGAGCTTCCGGGACTTGCAGCTGCGGCT  
GCTGCAGGCTCCGCTGCAAGCGGACCTGACGGAGCAGGTGTGGAAGGTGCAGGACGCGCT  
GCAGAACCAGTCAGACTCGTTGCTGGCGCTGGCGGGCGCAGTGCAGCGGCTGGAGGGCGC  
GCTGTGGGGGCTGCAGGCGCAGGCGGTGCAGACCGAGCAGGCGGTGGCCCTGCTGCGGG  
ACCGCACGGGCCAGCAGAGCGACACGGCGCAGCTGGAGCTCTACCAGCTGCAGGTGGAGA  
GCAACAGTAGCCAGCTGCTGCTGAGGCGCCACGCGGGCCTGCTGGACGGGCTGGCGCGCA  
GGGTGGGCATCCTGGGCGAGGAGCTGGCCGACGTGGGCGGCGTGTGCGCGGCCCTCAACC  
ACAGCCTGTCTACGACGTGGCCCTCCACCGCACGCGGCTGCAGGACCTGCGGGTGTGGT  
GAGCAACGCCAGCGAGGACACGCGCCGCCTGCGCCTGGCGCACGTAGGCATGGAGCTGCA  
GCTGAAGCAGGAGCTGGCCATGCTCAACGCGGTACCCGAGGACCTGCGCCTCAAGGACTGG  
GAGCACTCCATCGCACTGCGGAACATCTCCCTCGCGAAAGGGCCACCGGGACCCAAAGGTG  
ATCAGGGGGATGAAGGAAAGGAAGGCAGGCCTGGCATCCCTGGATTGCCTGGACTTCGAGG  
TCTGCCCGGGGAGAGAGGTACCCAGGATTGCCCGGGCCCAAGGGCGATGATGGGAAGCT  
GGGGGCCACAGGACCAATGGGCATGCGTGGGTTCAAAGGTGACCGAGGCCCAAAAGGAGA  
GAAAGGAGAGAAAGGAGACAGAGCTGGGGATGCCAGTGGCGTGGAGGCCCCGATGATGATC  
CGCCTGGTGAATGGCTCAGGTCCGCACGAGGGCCGCGTGGAAAGTGTACCACGACCGGCGC  
TGGGGCACCGTGTGTGACGACGGCTGGGACAAGAAGGACGGAGACGTGGTGTGCCGCATG  
CTCGGCTTCCGCGGTGTGGAGGAGGTGTACCGCACAGCTCGATTCCGGCAAGGCACTGGGA  
GGATCTGGATGGATGACGTTGCCTGCAAGGGCACAGAGGAAACCATCTTCCGCTGCAGCTTC  
TCCAAATGGGGGGTGACAACTGTGGACATGCCGAAGATGCCAGCGTGACATGCAACAGACA  
CTGAGGATCCacg

#### >soluble SCARA5-AVI-HIS amino acid sequence – 470 aa

MGAAARTLRLALGLLLLATLLRPADASSAPHHHHHHHHSGGLNDIFEAQKIEWHESGRPRSSPDD  
LKALTRNVNRLNESFRDLQLRLLQAPLQADLTEQVWKVQDALQNSDLSLLALAGAVQRLEGALW  
GLQAQAVQTEQAVALLRDRTGQQSDTAQLELYQLQVESNSSQLLLRRHAGLLDGLARRVGLGEE  
LADVGGVLRGLNHSLSYDVALHRTRLQDLRVLVSNAEDTRRLRLAHVGMELQLKQELAMLNAV  
EDLRLKDWEHSIALRNISLAKGPPGPKGDQDEGKEGRPGIPGLPGLRGLPGERGTPGLPGPKG  
DDGKLGATGPMGMRGFKGDRGPKGKEKGDRAAGDASGVEAPMMIRLVNGSGPHEGRVEVYH  
DRRWGTVCDGWDKKGDVVCRMLGFRGVEEVYRTARFGQGTGRIWMDDVACKGTEETIFRC  
SFSKWGVTNCGHAEDASVTCNRH

**Legend:** Underline = restriction site; Red = CCACC Kozak sequence; Blue = TIMP2-  
signal peptide; Yellow = SSAP linker; Green = 8-His-tag; Purple = avidin-tag; Grey = SG  
linker; White = SCARA5 sequence

Supplemental Figure 4.

**SCARA5 + DAPI**

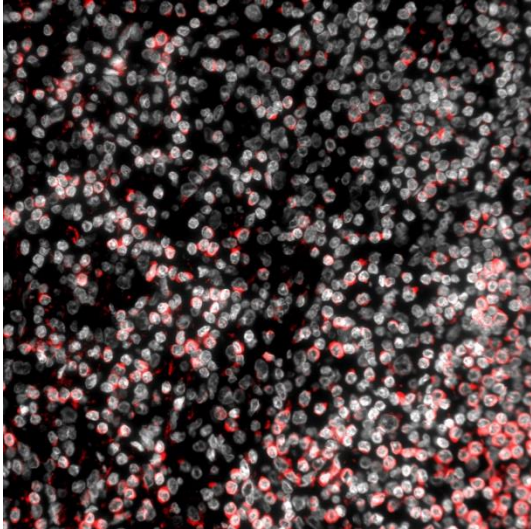

**VWF + DAPI**

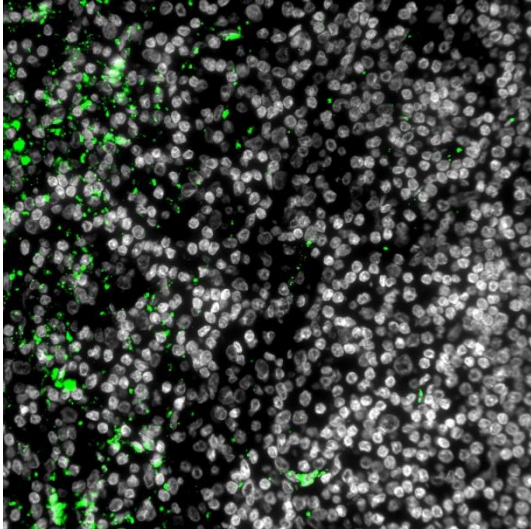

**SCARA5 + VWF + DAPI**

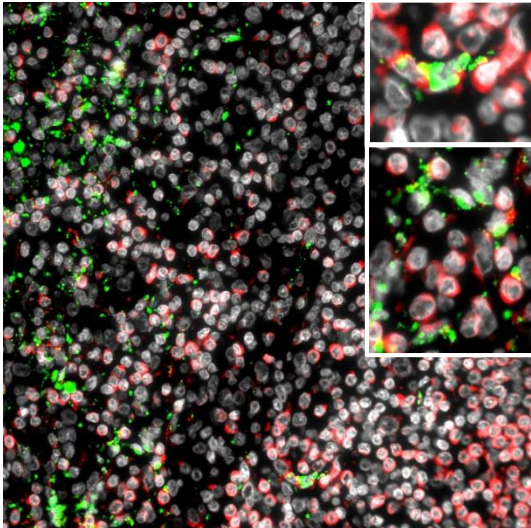

**SCARA5 + VWF + CD8α + DAPI**

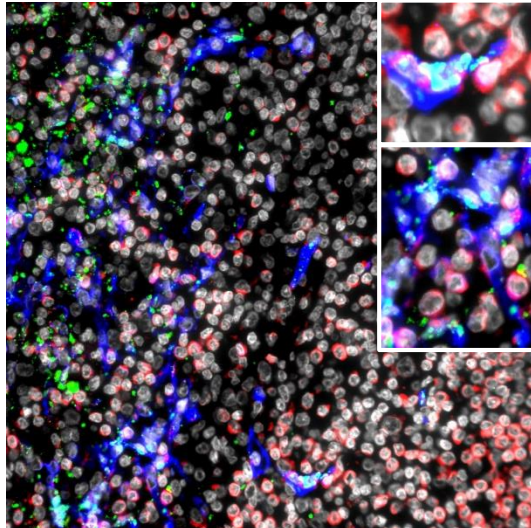

Supplemental Figure 5.

**SCARA5 + DAPI**

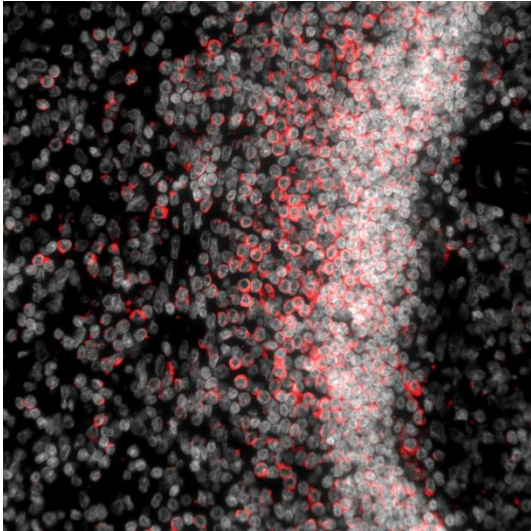

**VWF + DAPI**

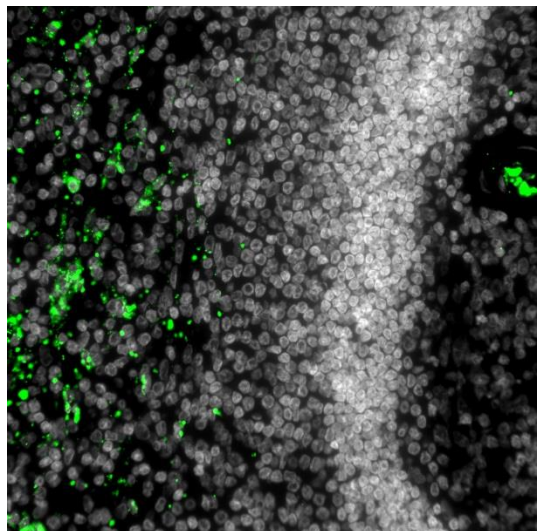

**SCARA5 + VWF + DAPI**

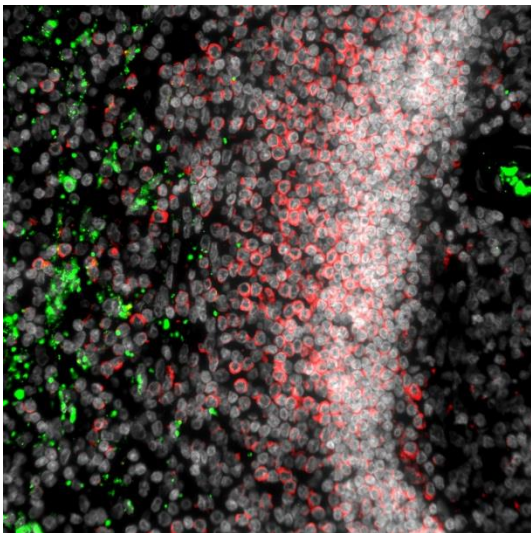

**SCARA5 + VWF + CD8 $\alpha$  + DAPI**

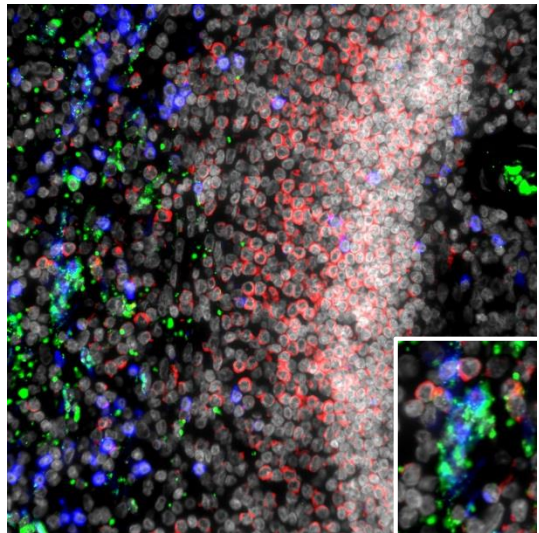

## Supplemental Table 1.

| Gene   | SNP ID     | MAF      | R2       | D'       | Distance (nt) | Variant nomenclature        |
|--------|------------|----------|----------|----------|---------------|-----------------------------|
| SCARA5 | rs4276643  | 0.273775 | 0.819704 | 0.991409 | -2294         | c.241+20332G>A              |
| SCARA5 | 8:27804449 | 0.242075 | 0.953134 | 0.984015 | -3144         | 8:27804449:<br>G:GTTTTTTTTC |
| SCARA5 | rs2685422  | 0.207493 | 0.801629 | 0.981124 | -4079         | c.241+18547C>T              |
| SCARA5 | rs2685421  | 0.25072  | 0.909175 | 0.983693 | -4193         | c.241+18433C>T              |
| SCARA5 | rs2726950  | 0.270893 | 0.80328  | 0.974317 | -5459         | c.241+17167T>C              |

**Supplemental Table 2.**

| Gene   | SNP ID     | MAF      | R2       | D'       | Distance | Variant nomenclature |
|--------|------------|----------|----------|----------|----------|----------------------|
| SCARA5 | rs73568968 | 0.206052 | 0.973793 | 0.991154 | 3770     | c.241+13218C>A       |
| SCARA5 | rs73568971 | 0.206052 | 0.973793 | 0.991154 | -1032    | c.241+8416C>T        |
| SCARA5 | rs11783561 | 0.210375 | 0.931218 | 0.973446 | -5532    | c.241+3916G>T        |
| SCARA5 | rs10087301 | 0.206052 | 0.973793 | 0.991154 | -6309    | c.241+3139T>C        |
| SCARA5 | rs2685404  | 0.231988 | 0.866765 | 1        | -6999    | c.241+2449C>T        |
| SCARA5 | rs2685402  | 0.229107 | 0.848799 | 0.981577 | -8277    | c.241+1171T>C        |
| SCARA5 | rs11780263 | 0.206052 | 0.973793 | 0.991154 | -9349    | c.241+99C>T          |
| SCARA5 | rs73568976 | 0.207493 | 0.982529 | 0.991226 | -9682    | c.113-106A>C         |
| SCARA5 | rs2726939  | 0.231988 | 0.866765 | 1        | -9987    | c.113-411T>C         |
| SCARA5 | rs2685399  | 0.226225 | 0.895518 | 1        | -10415   | c.113-839C>A         |
| SCARA5 | rs11779320 | 0.190202 | 0.87974  | 0.990281 | -11291   | c.113-1715G>A        |
| SCARA5 | rs58732749 | 0.198847 | 0.930581 | 0.990775 | -11506   | c.113-1930G>C        |
| SCARA5 | rs11786033 | 0.198847 | 0.930581 | 0.990775 | -11516   | c.113-1940C>A        |

### Supplemental Table 3.

|                                | <b>rs2726953</b>                    | <b>rs9644133</b>                    |
|--------------------------------|-------------------------------------|-------------------------------------|
| HGVS nomenclature              | c.242-21543C>T                      | c.241+9448G>A                       |
| MAF                            | 0.262                               | 0.267                               |
| VWF:Ag (%):<br>β (CI), p-value | -0.006 (-0.036 - 0.024),<br>p=0.683 | 0.009 (-0.020 - 0.038),<br>p=0.534  |
| VWF:RCo:<br>β (CI), p-value    | 0.003 (-0.028 - 0.035),<br>p=0.835  | 0.018 (-0.013 - 0.05),<br>p=0.255   |
| FVIII:C:<br>β (CI), p-value    | -0.009 (-0.064 - 0.046)<br>p=0.741  | -0.012 (-0.066 - 0.042),<br>p=0.654 |
